# Supplementary material for: Discordant Haplotype Sequencing Identifies Functional Variants at the 2q33 Breast Cancer Risk Locus
Source: Oxford University Press journal article supplement (doi:10.1158/0008-5472.can-15-1629), 2016-01-21
Supplement: 00085472can151629-sup-151325_2_supp_3283109_nzscm9.docx [file 00085472can151629-sup-151325_2_supp_3283109_nzscm9.docx]

**Supplemental Figure legend**

**Supplemental Figure:** Description of sample sets for the DNAseq and RNAseq experiments.
